# Supplementary material for: Disulfide bonds-containing amphiphilic conetworks with tunable reductive-cleavage
Source: Royal Society of Chemistry journal article supplement (doi:10.1039/c6ra02824a), 2016-01-01
Supplement: c6ra02824a1.pdf [file c6ra02824a1.pdf]

## **Supporting Information**

### **Disulfide Bonds-Containing Amphiphilic Conetworks with Tunable Reduction-Cleavage Property**

Shan Zhang, Heng Chen and Jie Kong\*

Shaanxi Key Laboratory of Macromolecular Science and Technology, School of Science,  
Northwestern Polytechnical University, Xi'an, 710072, P. R. China

\*Corresponding Author, E-mail address: kongjie@nwpu.edu.cn, Tel.(fax): +86-29-88431621.

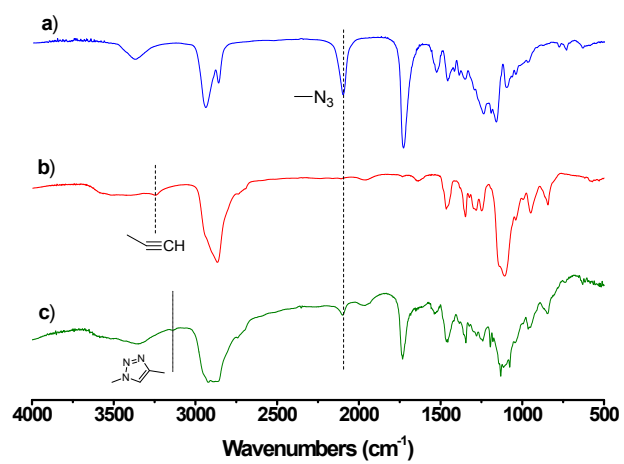

**Figure S1** FT-IR spectra of A2 macromonomer (N3-PCL10-SS-PCL10-N3) (a), B4 macromonomer (b) and disulfide bonds-containing PEG-PCL based APCN-2 (c).

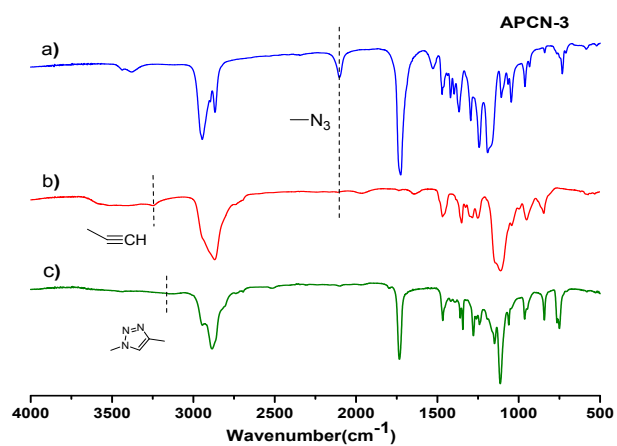

**Figure S2** FT-IR spectra of A<sub>2</sub> macromonomer (N<sub>3</sub>-PCL<sub>40</sub>-SS-PCL<sub>40</sub>-N<sub>3</sub>) (a), B<sub>4</sub> macromonomer (b) and disulfide bonds-containing PEG-PCL based APCN-3 (c).

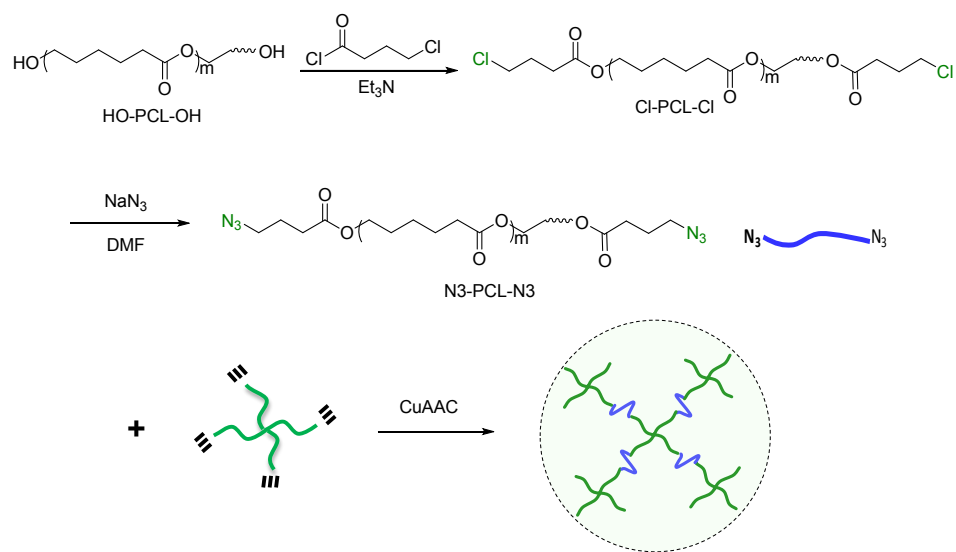

**Figure S3** Synthetic route of PEG-PCL based APCN-4

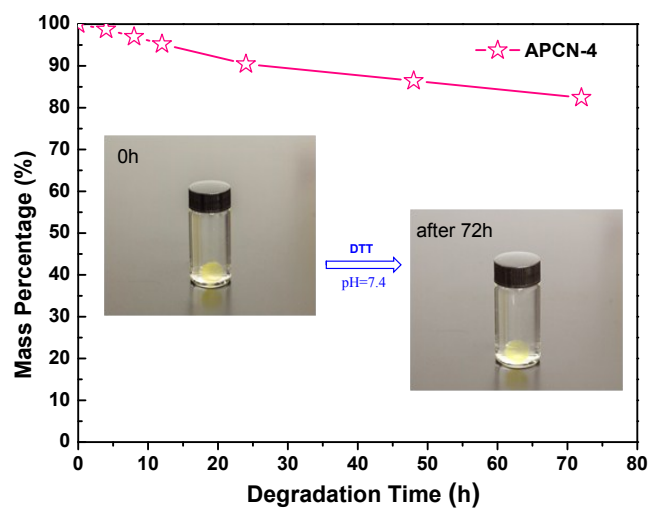

**Figure S4** Mass loss profiles of APCN-4 as a function of degradation time in 1.0 mg/mL DTT-PBS solution
